1       **How does literacy affect speech processing? Not by enhancing**  
2       **cortical responses to speech, but by promoting connectivity of**  
3       **acoustic-phonetic and graphomotor cortices.**

4  
5       **Abbreviated Title: Learning to write shapes literate speech perception**

6  
7       **Authors:** Alexis Hervais-Adelman<sup>1,2,\*</sup>, Uttam Kumar<sup>3</sup>, Ramesh K. Mishra<sup>4</sup>,  
8       Viveka N. Tripathi<sup>5</sup>, Anupam Guleria<sup>3</sup>, Jay P. Singh<sup>5</sup>, and Falk Huettig<sup>6</sup>

9                                       **Affiliations:**

10       <sup>1</sup> Neurolinguistics, University of Zurich, Department of Psychology,  
11       Binzmühlerstrasse 14, 8050, Zurich, Switzerland

12       <sup>2</sup> Neuroscience Center Zurich, University of Zurich and Eidgenössische Technische  
13       Hochschule Zurich, 8057 Zurich, Switzerland

14       <sup>3</sup> Centre of Biomedical Research, Raibareli Road, Lucknow-226014, Uttar Pradesh,  
15       India.

16       <sup>4</sup>University of Hyderabad, Prof. C.R. Rao Road, Gachibowli, Hyderabad-500046,  
17       Telangana, India.

18       <sup>5</sup> Centre for Behavioural and Cognitive Sciences, University of Allahabad, University  
19       Road, Old Katra, Allahabad-211002, Uttar Pradesh, India.

20       <sup>6</sup> Max Planck Institute for Psycholinguistics, Wundtlaan 1, 6525 XD Nijmegen, The  
21       Netherlands.

22  
23  
24       \*Corresponding author. Email:alexis.hervais-adelman@uzh.ch  
25

26

27 **Abstract:** Previous research suggest that literacy, specifically learning alphabetic  
28 letter-to-phoneme mappings, modifies online speech processing, and enhances  
29 brain responses to speech in auditory areas associated with phonological processing  
30 (Dehaene et al., 2010). However, alphabets are not the only orthographic systems in  
31 use in the world, and hundreds of millions of individuals speak languages that are  
32 not written using alphabets. In order to make claims that literacy *per se* has broad  
33 and general consequences for brain responses to speech, one must seek  
34 confirmatory evidence from non-alphabetic literacy. To this end, we conducted a  
35 longitudinal fMRI study in India probing the effect of literacy in Devanagari, an  
36 abugida, on functional connectivity and cerebral responses to speech in 91  
37 variously literate Hindi-speaking individuals. Twenty-two completely illiterate  
38 participants underwent six months of reading and writing training. Devanagari  
39 literacy increases functional connectivity between acoustic-phonetic and  
40 graphomotor brain areas, but we find no evidence that literacy changes the way  
41 speech is processed, either in cross-sectional or longitudinal analyses. These  
42 findings shows that a radical reconfiguration of the neurofunctional substrates of  
43 online speech processing is not a universal result of learning to read, and raise the  
44 possibility that writing, not only reading, may be instrumental in moulding literate  
45 speech perception.

46

47 **Significance Statement:** It has come to be accepted that a consequence of being  
48 able to read is enhanced auditory processing of speech, reflected by increased  
49 cortical responses in areas associated with phonological processing. Here we find no  
50 relationship between literacy and the magnitude of brain response to speech stimuli  
51 in individuals who speak Hindi, which is written using a non-alphabetic script,  
52 Devanagari - an abugida. We propose that the exact nature of the script under  
53 examination must be considered before making sweeping claims about the  
54 consequences of literacy for the brain. Further, we find evidence that literacy  
55 enhances functional connectivity between auditory processing areas and  
56 graphomotor areas, suggesting a mechanism whereby learning to write, not only to  
57 read, might influence speech perception.

58

59

## 60 Introduction

61 Learning to read and write involves acquiring a mapping of spoken language  
62 to orthographic symbols, which have both a visual (recognition) and a motor  
63 (production) component. These mapping processes have been suggested to have  
64 functional consequences for brain areas associated with acoustic-phonetic  
65 processing that are manifest during the processing of speech. It has been argued  
66 that literacy modifies the underlying phonological code for speech reception, as  
67 evidenced in increased brain responses to speech in auditory areas in literate  
68 compared to illiterate individuals (Dehaene et al., 2010). But how universal are such  
69 effects? While literacy in *alphabetic* script may induce such changes, alphabetic  
70 scripts encode subsyllabic segments, many of which cannot be produced in isolation  
71 (i.e. most consonants) and may therefore incur different phonological restructuring  
72 demands to other types of scripts that encode producible speech units (e.g.  
73 syllabaries, logosyllabaries and abugidas, Daniels, 2020). The worldwide diversity of  
74 orthographic systems invites closer examination of these findings to verify whether  
75 they hold for non-alphabetic writing systems. In psychology the pitfalls of drawing  
76 conclusions for the whole of humanity based only on the so-called "WEIRD"  
77 (Western, educated, industrialised, rich, democratic) populations (Henrich, Heine, &  
78 Norenzayan, 2010) are increasingly understood, and the study of literacy is no  
79 exception. In this study, we aimed to extend the generalizability of conclusions  
80 regarding the impact of literacy on brain responses to speech.

81

82 Notwithstanding the particularities of the orthographic system at hand, literacy is  
83 almost never acquired as a purely receptive skill, but typically involves a significant  
84 motor component when learning to write. Nevertheless, the role of learning to write in  
85 developing acoustic-phonetic representations at the level encoded by the script is  
86 barely discussed, even though there would be every reason to posit that creating  
87 motor-auditory mappings may lead to adaptations analogous to those of learning the  
88 visual-auditory mappings of script.

89

90 In this study, we used fMRI to record cerebral responses to auditory sentences in a  
91 group of 91 Hindi-speaking individuals of varying levels of literacy (ranging from  
92 illiterate to fluent readers) from rural communities in Northern India, first in cross-  
93 sectional investigation, and in a follow-up investigation after 22 illiterate participants  
94 had undergone a six-month long literacy training intervention. We deliberately used a  
95 listening task with no meta-linguistic component to ensure that any observed effects  
96 were not the result of deliberate, task-driven, phonological processing components.  
97 We also examined functional connectivity to phonological processing regions during  
98 speech processing in order to evaluate the potential visuo-auditory and  
99 graphomotor-auditory links that may be modified in literate individuals. Analyses  
100 were carried out to seek a relationship between literacy and brain response, at the  
101 whole-brain level and in three regions of interest: the left Planum Temporale (PT)  
102 and left Posterior Superior Temporal Gyrus (pSTG) both associated with acoustic-  
103 phonetic processing of speech and the Visual Word-Form Area (VWFA, an area of  
104 left posterior fusiform gyrus with a particular sensitivity to orthographic stimuli).

105

106

107 Contrary to the assumption that literacy necessarily induces changes to online  
108 speech processing, we find no evidence for changes to online speech processing,  
109 either cross-sectionally or longitudinally, with Bayesian analyses suggesting  
110 substantial evidence in favour of there being no effect. However, we find significant  
111 evidence of literacy-enhanced functional connectivity between acoustic-phonetic  
112 processing areas of posterior superior temporal cortex with graphomotor areas,  
113 which is suggestive of the development of a functional link between a graphemic, as  
114 well as visual, code and speech processing. The findings call into question the  
115 widely-accepted impact of literacy on speech processing and also invite closer  
116 examination of the role of writing, not just reading, in shaping acoustic-phonetic  
117 processing of speech.  
118

## 119 **Materials and Methods**

120 The data presented in this paper includes a novel reanalysis of a subset of  
121 previously published data (Hervais-Adelman et al., 2019).

### 122 **Participants**

123 Participants were recruited from two villages near the city of Lucknow in the  
124 Northern Indian state of Uttar Pradesh as part of a study that was approved by the  
125 ethics committee of the Center of Biomedical Research, Lucknow. After giving  
126 informed consent, 91 healthy right-handed human volunteers without a known  
127 history of psychiatric disease or neurological condition took part in the study (see  
128 Demographic and Behavioural Data for more details). All of the participants were  
129 right-handed and examined by a medical doctor. None of the participants had any  
130 known neurological impairments. Participants were interviewed about their  
131 educational background. A word-reading test and a letter identification task were  
132 administered.

### 133 **Participant Characteristics**

134 Information on age, income and number of literate family members was  
135 obtained in an interview. Right-handedness was verified in interview by asking  
136 participants which hand they used for common activities (e.g. drawing). Raven's  
137 Progressive Matrices were administered to test non-verbal cognitive abilities. Two  
138 measures of literacy were recorded, namely letter identification (ability to name the  
139 46 primary Devanagari characters, called "Akshara") and word reading ability (ability  
140 to read out-loud 86 words of varying syllabic complexity). In the akshara-  
141 identification task participants received a recorded spoken instruction. In the spoken  
142 instruction, they were told that they would be presented with the letters of the Hindi  
143 alphabet one by one. They were told that each letter would be shown for five  
144 seconds followed by a question mark. The instruction specified that when the  
145 question mark was on the screen they should name the letter out loud. The response  
146 was recorded. The recording terminated automatically after ten seconds. The 46  
147 akshara of Devanagari were presented in font Mangal (size 96 point). The word  
148 reading test consisted of 86 words, presented one-at-a-time in font Mangal (size 96  
149 point). The words were of differing syllabic complexity (26 monosyllabic, 30

150 disyllabic, and 30 trisyllabic) and presented in a pseudorandomized order. Each  
 151 word was displayed on the screen for ten seconds followed by a question mark. A  
 152 spoken recorded instruction specified that when the question mark was on the  
 153 screen participants should say aloud the word they had seen. Participants'  
 154 responses were recorded. The recording terminated automatically after thirty  
 155 seconds. Participant characteristics and correlations between reading scores and  
 156 other factors are shown in Table 1, pairwise relationships between participant  
 157 characteristics are shown in Table 2.

158 There was an imbalance in the sex of the participants as a function of literacy  
 159 status, with illiterate participants being more likely to be female. This is driven by  
 160 cultural factors at the study site - literate participants acquired literacy during formal  
 161 education, and there has historically been a bias towards male children receiving  
 162 formal schooling. The potential consequences of this are not readily predictable,  
 163 though, as discussed in a previous report on these data (Hervais-Adelman et al.,  
 164 2019) existing findings do not suggest that the reading network is systematically  
 165 differently-localized in female compared to male samples. We therefore do not  
 166 believe that this limitation would account for effects that we observe.

167 **Table 1: Participant Characteristics, Time 1.** The mean values for the N=91 participants  
 168 included at Time 1. Relationships between each variable and Word Reading was calculated  
 169 using non-parametric correlation (Kendall's  $\tau$  -b), Significance flags: \*\*<.01,  
 170 \*\*\*<.001

171

|                             | Mean    | Std. Deviation | Minimum | Maximum | Relationship with word reading scores<br>Kendall's $\tau$ |
|-----------------------------|---------|----------------|---------|---------|-----------------------------------------------------------|
| <b>Age (years)</b>          | 28.165  | 5.57           | 18      | 40      | -0.214                                                    |
| <b>Monthly income (IRN)</b> | 2109.89 | 1277.589       | 0       | 9000    | 0.119                                                     |
| <b>N Family members</b>     | 4.506   | 1.525          | 2       | 8       | -0.02                                                     |
| <b>N Literate Members</b>   | 2.275   | 1.434          | 0       | 6       | -0.086                                                    |
| <b>Years of Schooling</b>   | 2.22    | 3.47           | 0       | 12      | 0.605***                                                  |

|                                         |        |        |   |    |          |
|-----------------------------------------|--------|--------|---|----|----------|
| <b>Word reading (max. 86)</b>           | 25.538 | 33.301 | 0 | 86 | n/a      |
| <b>Akshara Identification (max. 46)</b> | 21.132 | 17.458 | 0 | 46 | 0.746*** |
| <b>Raven's Matrices</b>                 | 15.385 | 4.997  | 8 | 35 | 0.242**  |

172

173 **Table 2: Pairwise Correlations Between Biographical Factors**

174

| Variable                    | Word reading   | Akshara Identification | Years of Schooling | Raven's Matrices | Age           | Sex (dummy coded: F=0, M=1) | Monthly Income | N. Family Members |
|-----------------------------|----------------|------------------------|--------------------|------------------|---------------|-----------------------------|----------------|-------------------|
| Word reading                | —              |                        |                    |                  |               |                             |                |                   |
| Akshara Identification      | 0.746, p<.001  | —                      |                    |                  |               |                             |                |                   |
| Years of Schooling          | 0.605, p<.001  | 0.58, p<.001           | —                  |                  |               |                             |                |                   |
| Raven's Matrices            | 0.242, p=.002  | 0.278, p<.001          | 0.239, p=.005      | —                |               |                             |                |                   |
| Age                         | -0.214, p=.006 | -0.228, p=.003         | -0.383, p<.001     | -0.088, p=.25    | —             |                             |                |                   |
| Sex (dummy coded: F=0, M=1) | 0.42, p<.001   | 0.411, p<.001          | 0.491, p<.001      | 0.207, p=.021    | -0.209, p=.02 | —                           |                |                   |
| Monthly Income              | 0.119, p=.147  | 0.108, p=.171          | 0.043, p=.626      | -0.064, p=.423   | 0.061, p=.446 | 0.039, p=.677               | —              |                   |

|                            |                   |                   |                   |                   |                  |                   |                   |                  |
|----------------------------|-------------------|-------------------|-------------------|-------------------|------------------|-------------------|-------------------|------------------|
| N. Family Members          | -0.02,<br>p=.817  | -0.012,<br>p=.888 | -0.063,<br>p=.495 | -0.149,<br>p=.072 | 0.287,<br>p<.001 | -0.037,<br>p=.701 | -0.006,<br>p=.943 | —                |
| N. Literate Family Members | -0.086,<br>p=.367 | -0.058,<br>p=.527 | -0.101,<br>p=.327 | -0.229,<br>p=.014 | 0.151,<br>p.104  | -0.036,<br>p=.741 | -0.145,<br>p=.139 | 0.558,<br>p<.001 |

## 175 MRI Procedure

176 Stimuli were presented blocked by condition. There were ten blocks for each  
177 task, which were arranged in a different pseudo-random order for each participant.  
178 Stimulus presentation was controlled using E-Prime (Psychology Software Tools).

179 **Stimuli:** Six stimulus categories were presented in the localiser block: Visual  
180 Sentences, Auditory Sentences, Horizontal Checkerboards and Vertical  
181 Checkerboards. Two further conditions were included that invited participant  
182 responses – visual (written) and spoken commands. These commands asked the  
183 participant to respond by pressing either the left or right response button of an MR-  
184 Compatible button box. Behavioural responses to these trials are not analysed and  
185 the conditions are not described further. Ten blocks of each stimulus were presented  
186 in a randomized order (randomized per participant). In each visual sentence block  
187 each trial consisted of a simple sentence, which was shown on four successive  
188 screens with 1-3 words on each screen. Each screen was shown for 400 ms with an  
189 interval of 100 ms between each screen. Between each sentence there was a 500  
190 ms pause. All words were displayed in font 'Mangal' size 86. The words were shown  
191 at the centre of the screen. Participants received a recorded auditory instruction to  
192 read the sentences. Blocks lasted 33 seconds.

193 For auditory sentences, each block consisted of ten sentences. Sentences  
194 were presented auditorily with four audio sequences comprising 1-3 words for each  
195 sentence. Participants were instructed to listen to the sentences carefully. Blocks  
196 lasted approximately 60s (mean: 59.55, range: 57.75 – 66.19s).

197 Vertical and horizontal checkerboard blocks each consisted of 30 flashing  
198 vertical checkerboards. The checkerboards changed their contrast after 400 ms.  
199 Each block lasted 12 seconds (30x400 ms). Analyses of these stimuli are not  
200 presented here, they have previously been discussed (Hervais-Adelman et al.,  
201 2019).

## 202 Regions of Interest

203 *ROI Definitions:* A goal of the investigation was to probe the claims of Dehaene and  
204 colleagues (Dehaene et al., 2010) regarding the change in responsiveness to  
205 speech in PT as a function of literacy. We therefore defined a target ROI based on  
206 the coordinates of the peak effect of literacy on response to spoken language  
207 processing in their investigation. A sphere of radius 8mm centred at MNI (x,y,z mm):  
208 -38, -28, 18.

209 However, since Dehaene et al.'s interpretation of their finding is at the level of  
210 phonological processing of speech, it seems important to test the possibility that  
211 other phonetic processing regions may be affected by literacy. Given recent  
212 functional imaging and intracranial reports of the role of posterior superior temporal  
213 gyrus in processing of speech, particularly at the phonological level, a second ROI  
214 was created in the left posterior superior temporal gyrus (pSTG). This ROI was  
215 based on the coordinates published by Chevillet and colleagues (Chevillet, Jiang,  
216 Rauschecker, & Riesenhuber, 2013) as a focus of acoustic-phonetic processing  
217 based on an fMRI investigation. A sphere of radius 8mm centred at MNI (x,y,z mm): -  
218 56, -50, 8 was used. This ROI was investigated in order to probe whether sites other  
219 than PT relevant to phoneme processing display any modulation of activation during  
220 as a function of literacy.

221 A VWFA ROI was created as a sphere of 8mm radius centred upon the coordinates  
222 reported in Hervais-Adelman et al. (2019), MNI (x,y,z mm): -45, -55, -10. This ROI  
223 constitutes a control region, where the effect of literacy on response to orthographic  
224 stimulation is already known, and serves to validate the analyses executed on the  
225 two other ROIs. Loci of the ROIs are shown in Figure 4.

226 **ROI data extraction:** Individual participant's T statistic for the contrast against  
227 baseline was extracted for all voxels in the ROI (excluding any missing values, i.e.  
228 voxels not containing brain tissue), and the mean was tested for a relationship with  
229 Literacy using Kendall's T. Analyses were conducted in MNI space, using normalised  
230 single-subject images.

## 231 **MRI data acquisition and pre-processing**

232 Anatomical and functional data were collected before and after the literacy program  
233 using a 3.0 Tesla Siemens MAGNETOM Skyra (Siemens AG, Germany) whole body  
234 magnetic resonance scanner using a 64-channel radiofrequency head coil. T1-  
235 weighted three-dimensional magnetization-prepared rapid-acquisition gradient echo  
236 (MPRAGE) images were obtained using a pulse sequence with TR=1.690ms,  
237 TE=2.60ms, TI=1.100ms, FOV=256x256, matrix size=256x256x192 and voxel size=  
238 1.0x1.0x1.0mm<sup>3</sup>. Functional images for the visual and localizer runs were acquired  
239 as continuous EPI (TR = 2400ms, TE=30ms, 38 slices, voxel size: 3.5 \* 3.5 \* 3mm,  
240 no interslice gap, interleaved slice order). Pre-processing was carried out using the  
241 default pipeline implemented in the Conn toolbox (Whitfield-Gabrieli & Nieto-  
242 Castanon, 2012), version CONN20.b, SPM12 build 7219. This involves functional  
243 realignment and unwarping, slice-timing correction (for Siemens interleaved  
244 acquisitions), both using SPM12 default settings, followed by outlier identification  
245 based on the observed BOLD signal and subject motion parameters. Acquisitions  
246 with frame-by-frame displacement of >0.9mm or global BOLD signal changes >5 s.d.  
247 were flagged as potential outliers. Identified outliers were later included in the first-  
248 level statistical design. A new reference image, based on all scans except marked  
249 outliers is produced. The Structural and functional data are then realigned and  
250 normalised to MNI space, and segmented into grey matter, white matter and CSF,  
251 using SPM12 unified segmentation and normalisation (Ashburner & Friston, 2005).



252 Default Conn parameters were used. Functional data were then smoothed using a  
253 Gaussian kernel of 8mm FWHM.

#### 254 Condition vs Baseline Activation Maps

255 The functional imaging session was modelled at the single-subject level using  
256 a GLM in SPM12. The design consisted of one regressor per condition (Sentence  
257 Reading, Visual Commands, Sentence Listening, Auditory Commands, Horizontal  
258 Checkerboards, Vertical Checkerboards). For each participant, additional regressors  
259 were included to flag any outlier scans identified during realignment (one regressor  
260 per scan). Six regressors of no interest coding for scan-to-scan movement (x, y and  
261 z translations and rotations) as well as a seventh term coding for scan-to-scan global  
262 BOLD change, and a constant term were added. Stimulus blocks were modelled as  
263 epochs convolved with the canonical haemodynamic response function in SPM12,  
264 and rest trials (baseline) were left unmodelled. To rule out the possibility of  
265 systematic effects of participant movement on any literacy-related results, the  
266 number of identified outliers was tested for a relationship with word reading scores,  
267 no significant relationships were found (Time 1: Kendall's  $\tau_b = .086$ ,  $p = .263$ ; Time 2:  
268  $\tau = -.094$ ,  $p = .323$ ). This also suggests that there was no systematic effect of literacy  
269 on compliance with the instruction to remain as still as possible in the scanner.

270 For each participant, parameter estimates for the auditory sentence and visual  
271 sentence conditions were contrasted with the baseline, and the resulting contrast  
272 images were used for second-level, random-effects, analyses, in which the individual  
273 subject data were tested for reliable group-level effects using a one-group t-test.

#### 274 Relationship between BOLD Response and Literacy

275 Due to the non-normal distribution of the reading scores across the group,  
276 analyses that sought to probe a literacy - BOLD link were executed using non-  
277 parametric statistics. This was achieved using the Randomise tool from the FSL  
278 package (Winkler, Ridgway, Webster, Smith, & Nichols, 2014), using 5000  
279 permutations to determine the null-distribution of the statistic for the contrast of  
280 interest. Results reported are significant at a cluster-mass threshold of  $p < .05$  FDR-  
281 corrected for multiple comparisons, with a cluster-forming threshold set to be  
282 equivalent to uncorrected  $p < .001$  (for  $N = 91$ ,  $t_{(90)} = 3.092$ )

#### 283 Functional connectivity

284 Functional connectivity analyses were carried out using the CONN toolbox version  
285 20.b (Whitfield-Gabrieli & Nieto-Castanon, 2012). First level design matrices for each  
286 participant from the fixed-effects analysis described above were entered into the  
287 toolbox. The default denoising pipeline was also run, with temporal filtering adjusted  
288 to use a high-pass filter with a cutoff of 0.008Hz. The low-frequency cut-off was  
289 omitted since the experimental conditions were presented in a block design, with  
290 relatively long block durations. The denoising procedure is fully described in  
291 Whitfield-Gabrieli and Nieto-Castanon (2012).

292 First-level functional connectivity was estimated for the three ROIs (PT, VWFA and  
 293 pSTG) with the rest of the brain (seed-to-voxel connectivity). This involves the  
 294 calculation of a Fisher-transformed bivariate correlation coefficient between the  
 295 BOLD time-series of the ROI and the BOLD time-series of each of the non-ROI  
 296 voxels. In order to probe the relationship between connectivity and literacy, the  
 297 individual condition-wise connectivity maps were then tested, voxelwise, for a  
 298 correlation with literacy, as indexed by word-reading scores. In order to avoid errors  
 299 due to the non-normal distribution of the reading scores, permutation testing (5000  
 300 permutations), as implemented in CONN for cluster-mass thresholding, was used to  
 301 determine significance of any effects at a whole-brain FDR corrected level of  $p < .05$ ,  
 302 with a cluster-forming threshold of uncorrected  $p < .001$ .

### 303 Literacy Training Intervention and MRI Follow-Up

304 A number of the illiterate participants (N=22) completed a six-month literacy training  
 305 program, after which they participated in an MRI session of the same design and  
 306 with the same stimuli as described above. Twelve illiterate participants returned for a  
 307 follow-up scan without training as did 25 literate participants. The training and non-  
 308 training groups were matched for age, gender, handedness, income, number of  
 309 literate family members, reading scores and non-verbal intelligence (Table 3).  
 310 Complete details of the training procedure and its efficacy are described elsewhere  
 311 (Hervais-Adelman et al., 2019), and summarised in the supplementary materials.  
 312 The longitudinal analyses were confined to the evaluating the response of the ROIs  
 313 to auditory and visual sentences.

314 **Table 3: Characteristics of follow-up participants**

|                                                             | <b>Trainees</b>   | <b>No Train</b>  | <b>Literate</b>  |
|-------------------------------------------------------------|-------------------|------------------|------------------|
| <b>N:</b>                                                   | 22                | 12               | 26               |
| <i>Age (Range)</i>                                          | 31.36 (22-40)     | 30.83 (22-49)    | 26.84 (18-40)    |
| <i>Sex [F:M]</i>                                            | 21:1              | 10:2             | 8:17             |
| <i>Handedness [R:L]</i>                                     | 22:0              | 12:0             | 25:0             |
| <i>Income (Range) [IRN/Month]</i>                           | 1795.455 (0-3000) | 2500 (2000-3000) | 1823.92 (0-9000) |
| <i>Marital Status<br/>(Married:Unmarried:Widowed)</i>       | 21:0:1            | 12:0:0           | 16:08:01         |
| <i>Number of Family Members</i>                             | 4.955 (2-8)       | 4.667 (2-7)      | 4.6 (2-8)        |
| <i>Number of Literate Family<br/>Members</i>                | 2.714 (0-6)       | 2.889 (1-4)      | 1.944 (1-5)      |
| <i>Years of Schooling (Range)</i>                           | 0 (0)             | 0 (0)            | 4.88 (0-11)      |
| <i>Word Reading Score T1<br/>(Range) [maximum 86]</i>       | 0.545 (0-6)       | 3.25 (0-13)      | 65.48 (9-86)     |
| <i>Word Reading Score T2<br/>(Range) [maximum 86]</i>       | 7.591 (0-33)      | 3.417 (0-14)     | 68.44 (19-85)    |
| <i>Letter recognition Score T1<br/>(Range) [maximum 46]</i> | 9.227 (0-38)      | 9.417 (0-35)     | 39.04 (20-46)    |
| <i>Letter recognition Score T2<br/>(Range) [maximum 46]</i> | 33.227 (30-46)    | 7.33 (0-36)      | 41.76 (30-46)    |

|                                 |           |               |              |
|---------------------------------|-----------|---------------|--------------|
| <i>Raven's Matrices (Range)</i> | 13 (8-18) | 13.167 (8-27) | 17.8 (10-35) |
|---------------------------------|-----------|---------------|--------------|

315

### 316 Pre- vs Post-Training Comparison of pSTG Connectivity

317 The connectivity analysis was re-run for all participants who returned for a second  
318 fMRI scan (N=60). The connectivity values, estimated as Beta weights output by the  
319 CONN toolbox, were extracted for a representative sphere of radius 8mm centred at  
320 the centre of mass of the GFMA cluster showing literacy-modulated connectivity with  
321 pSTG during speech processing (illustrated in Figure 3, see also Table S7). The  
322 mean connectivity within this sphere was calculated as the mean of all voxels  
323 (ignoring any missing values). The mean values for Timepoint 1 and Timepoint 2  
324 were then compared using a repeated measures ANVOA with a between-  
325 participants factor of group and a within-participants factor of timepoint. Post-hoc  
326 pairwise comparisons were executed and corrected using Holm's method for the full  
327 family (N=15) of comparisons executed.

### 328 Additional Bayesian Analyses of BOLD-Literacy Correlations in ROIs

329 Given the partially confirmatory nature of this investigation (attempting to reproduce  
330 effects of literacy on the response of auditory phoneme-processing cortical regions  
331 during speech processing), where possible, Bayesian analyses were executed to  
332 estimate the strength of any failures to replicate the prior effect. Bayesian analyses  
333 were carried out using JASP (JASP Team), using default parameters, unless  
334 otherwise indicated. Frequentist statistics are reported for the whole-brain fMRI  
335 analyses, as Bayesian analysis tools are not yet readily available for these.  
336 Frequentist p values are provided wherever Bayes factors are not available. Bayes  
337 factors are presented as  $BF_{10}$ , indicating the ratio of evidence in favour of the  
338 alternative hypothesis. Values greater than one indicate evidence in favour of the  
339 alternative hypothesis, values lower than one indicate evidence in favour of the null  
340 hypothesis.

341

## 342 **Results**

### 343 Relationships between reading ability and demographic factors

344 Complete demographic data are presented in Supplementary Table 1. These data  
345 are also presented in a previous publication reporting on these participants (38).

346

347 Pairwise correlation analyses using Kendall's  $\tau_b$  were carried out to test for  
348 relationships between literacy and various demographic factors, including age, sex,  
349 monthly income and performance on Raven's Matrices of all the participants at the  
350 first time point (N participants = 91). The complete set of pairwise correlations is  
351 reported in Supplementary Table 2. As would be expected from the participant  
352 selection procedure, significant correlations of interest were found between the  
353 literacy measures (word reading and Akshara recognition) and Years of schooling

354 (Word reading:  $\tau=.605$ ,  $p<.001$ , Akshara recognition:  $\tau=0.580$ ,  $p<.001$ ). There was  
355 also a significant relationship between literacy and sex (dummy coded as a binary  
356 variable), such that female participants were less likely to be literate, which is due to  
357 cultural factors affecting access to schooling at the study site (Word reading:  $\tau=.420$ ,  
358  $p<.001$ , Akshara recognition:  $\tau=0.411$ ,  $p<.001$ ). There was a negative correlation  
359 between age and literacy (Word reading:  $\tau=-.214$ ,  $p=.006$  Akshara recognition:  $\tau=-$   
360  $.228$ ,  $p=.003$ ), indicating that the more literate participants tended to be younger than  
361 the illiterate participants. A further relationship was found between literacy and  
362 Raven's matrices performance (Word reading:  $\tau=.242$ ,  $p=.002$ , Akshara recognition:  
363  $\tau=0.278$ ,  $p<.001$ ).

364

365 In order to rule out a potential confounding effect of underlying fluid intelligence  
366 differences, a mediation analysis was carried out to test for a potential mediating  
367 effect of Raven's Matrices performance on the relationship between years of  
368 schooling and literacy. The analysis was carried out using the MeMoBootR package  
369 (Buchanan, 2018) in R version 4.0.5 (R Core Team, 2015). The path plot for the  
370 mediation analysis is shown in Figure 1. Evaluating the relationship between years of  
371 schooling mediated by Raven's (assumed to be a proxy for non-verbal IQ) shows a  
372 direct effect of schooling on word reading ( $b = 6.76$ ,  $t(89)=9.362$ ,  $p<.001$ ), a  
373 significant relationship between Education and Raven's ( $b = 0.402$ ,  $t(89)=2.74$ ,  
374  $p=.007$ ) and a significant relationship between Raven's and Literacy when  
375 accounting for Education ( $b = 1.182$ ,  $t(88)=2.319$ ,  $p=.023$ ). The direct effect of  
376 Education on Literacy is, however, not significantly modulated by Raven's (direct  
377 effect, accounting for Ravens,  $b = 6.285$ ,  $t(88) = 8.562$ ,  $p<.001$ , Aroian Sobel test  
378  $z=1.705$ ,  $p=.088$ , bootstrapped 95% confidence for the indirect effect:  $-0.151$ ,  
379  $1.130$ ). Thus, the component of non-verbal intelligence reflected in Raven's  
380 performance is not responsible for literacy and it may even be speculated that  
381 superior Raven's performance in the literate participants could itself be the result of  
382 schooling.

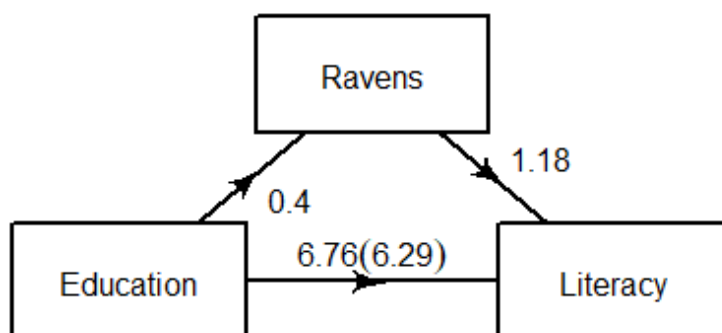

383

384 **Figure 1 Path plot for mediation analysis of effect of Raven's performance on the**  
385 **direct relationship between years of schooling and literacy.** Mediation analysis suggests  
386 that the influence of years of schooling on literacy is not mediated by Raven's performance  
387 (Sobel test  $z=1.705$ ,  $p=.088$ , bootstrap (N=1000 permutations) 95% confidence interval:  $-$   
388  $0.151$ ,  $1.130$ )

389 It is noteworthy that monthly income is not significantly related to literacy (Word  
390 reading:  $\tau=.119$ ,  $p=.147$ , Akshara recognition:  $\tau=.108$ ,  $p<.171$ ), indicating that literacy  
391 is unlikely to be a primary determinant of socio-economic status in the communities  
392 from which the study participants were drawn.

### 393 **Six months of Literacy Training – A partially successful intervention**

394 Of the 91 participants initially tested, 60 returned for a follow-up scan, for whom  
395 complete data are available for only 59 (due to an error in collecting behavioural data  
396 for one participant during the follow-up session), comprising three groups: Literate  
397 ( $N=25$ , mean Word reading score: 64.58), Illiterate participants who participated a  
398 six-month literacy training and non-trained ( $N=22$ , mean word reading score: 0.55),  
399 control illiterate individuals ( $N=12$ , mean word reading score: 3.25).

400 Repeated measures ANOVA, including a between-subjects factor of Group (Literate,  
401 Illiterate Trainee and Illiterate Control) and a within-participants factor of Session  
402 (Time 1, Time 2) was used to determine whether training had a significant impact on  
403 literacy. As reported previously (Hervais-Adelman et al., 2019), the literacy training  
404 program was a mixed success, descriptive plots are shown in Figure 2. A significant  
405 group-by-timepoint interaction indicated that trained participants improved in their  
406 Akshara recognition performance ( $F_{(2,56)}=58.463$ ,  $p<.001$ ,  $\text{partial-}\eta^2=.676$ ), but this  
407 interaction was not significant for word reading ( $F_{(2,56)}=1.430$ ,  $p=.248$ ,  $\text{partial-}\eta^2=$   
408  $.049$ ). Planned pairwise tests for the simple effect of Time on literacy scores within  
409 group indicated significant improvements in the trainees ( $N=22$ , Akshara:  
410  $F_{(1)}=200.69$ ,  $p<.001$ ; Word reading:  $F_{(1)}=7.673$ ,  $p=.008$ ) that were absent in the  
411 untrained illiterate participants ( $N=12$ , Akshara:  $F_{(1)}=0.825$ ,  $p=.368$ ; Word reading:  
412  $F_{(1)}=0.002$ ,  $p=.962$ ) and in the Literate participants, who also received no training  
413 ( $N=25$ , Akshara:  $F_{(1)}=2.929$ ,  $p=.093$ ; Word reading:  $F_{(1)}=1.539$ ,  $p=.220$ ). These  
414 results confirm that training improved literacy, albeit that the six-month program did  
415 not suffice to render the formerly illiterate individuals fluent readers of words in  
416 Devanagari script.

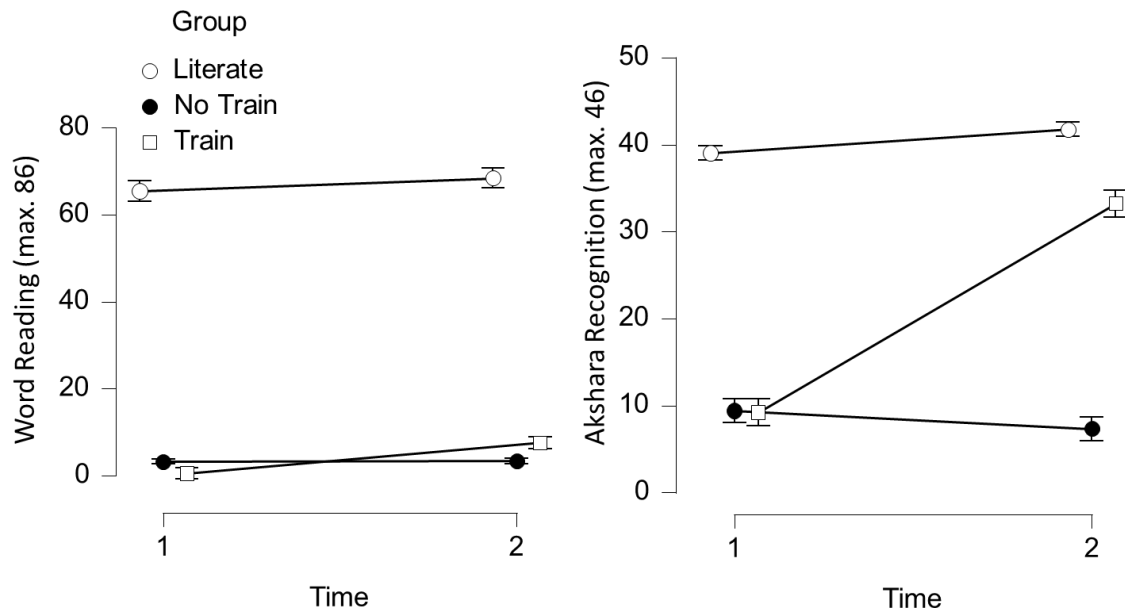

417

418 **Figure 2 Mean reading scores by participant group, at Times 1 and 2.** Error bars show  
419 standard error of the mean. Left panel shows word reading performance, right panel shows  
420 Akshara recognition performance. A significant improvement in Akshara recognition, and to  
421 a lesser extent, word reading performance, is found in the trained illiterate participants.

422

#### 423 Cerebral Responses to Speech and Orthographic Stimuli

424 Initial control analyses comparing the sentence listening and sentence reading  
425 conditions to baseline served to verify that expected patterns of, respectively,  
426 auditory, and visual activation were apparent (Figure 3). Listening to sentences  
427 produced significant increases in substantial expanses of bilateral superior temporal  
428 areas, consistent with speech processing (Hickok, 2012; Price, 2012), as well as  
429 increases in left inferior frontal gyrus broadly consistent with linguistic processes  
430 implicated in sentence processing (Friederici, 2012; Hagoort, 2017; Price, 2012).  
431 Visual presentation of sentences (which, it must be noted, were not interpretable for  
432 a large proportion of the participants) lead on average to widespread significant  
433 bilateral visual cortical activation compared to baseline.

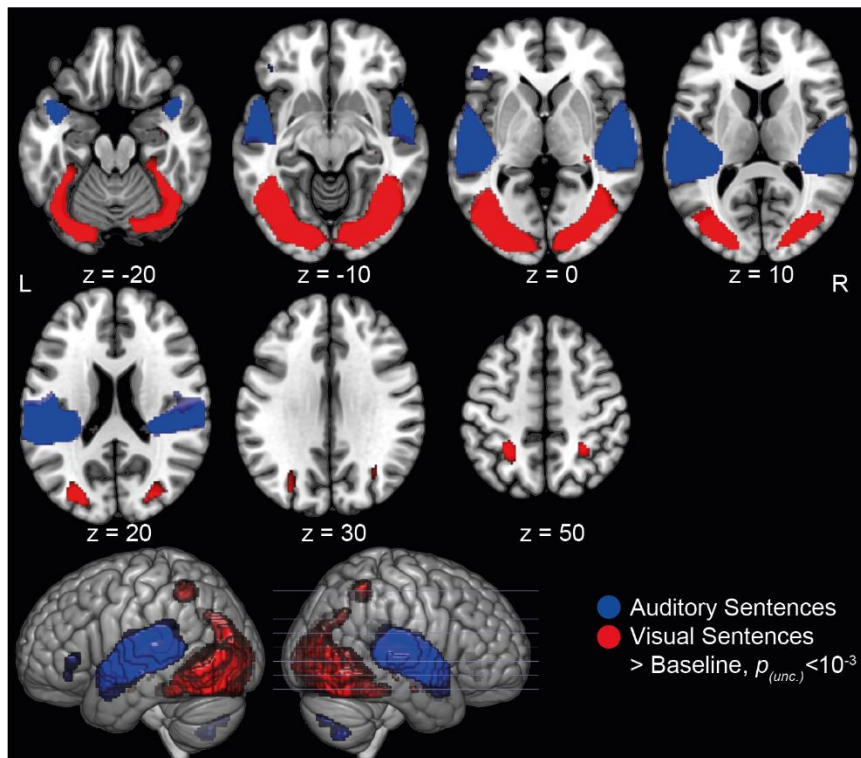

434

435 **Figure 3 Group mean activation map for Auditory Sentences vs Baseline and Visual**  
436 **Sentences vs Baseline**, thresholded at voxelwise  $p(\text{unc.}) < .001$ , with a cluster-level  
437 significance of  $p(\text{FWE}) < .05$ , projected on MNI single subject template brain. Z co-ordinates  
438 (MNI mm) are supplied for each slice and marked on the render in bottom-row.  
439 Abbreviations: L – left, R - right

440 **Table 4: Sentence listening vs Baseline.** Loci of peaks (local maxima within a cluster  
441 separated by a minimum of 8mm) showing significant (cluster-size  $p < .05$  FDR-corrected for  
442 multiple comparisons with a cluster-forming threshold of  $p < .001$  uncorrected) increase in  
443 BOLD over all participants when listening to sentences. Bold rows indicate peak of a cluster.  
444 Abbreviations: Hem-Hemisphere, L-Left; R-Right; unc. – uncorrected; fdr – false discovery  
445 rate

446

| Hem | Label                                           | Brodmann Area | Cluster Size (voxels) | Cluster size $p$ (unc.) | Cluster Size $p$ (fdr) | Coordinates (MNI) |     |     | Statistic T | Voxel $p$ (fdr) |
|-----|-------------------------------------------------|---------------|-----------------------|-------------------------|------------------------|-------------------|-----|-----|-------------|-----------------|
|     |                                                 |               |                       |                         |                        | x                 | y   | z   |             |                 |
| R   | <b>Superior Temporal Gyrus</b>                  | 22            | 5533                  | <.001                   | <.001                  | 60                | -10 | 2   | 23.55       | <.001           |
| R   | Superior Temporal Gyrus                         | 22            |                       |                         |                        | 58                | -18 | 4   | 22.85       | <.001           |
| R   | Heschl's Gyrus                                  |               |                       |                         |                        | 48                | -18 | 10  | 21.36       | <.001           |
| L   | <b>Superior Temporal Gyrus</b>                  | 22            | 6661                  | <.001                   | <.001                  | -54               | -14 | 6   | 23.16       | <.001           |
| L   | Superior Temporal Gyrus                         | 22            |                       |                         |                        | -62               | -20 | 6   | 21.97       | <.001           |
| L   | Superior Temporal Gyrus                         | 22            |                       |                         |                        | -52               | -2  | -6  | 17.21       | <.001           |
| L   | Superior Temporal Pole                          | 21            |                       |                         |                        | -46               | 4   | -16 | 13.39       | <.001           |
| L   | White Matter (splenium of Corpus Callosum)      |               |                       |                         |                        | -14               | -34 | 22  | 4.57        | .036            |
| R   | <b>Cerebellum Lobule 8</b>                      |               | 339                   | .001                    | .005                   | 24                | -62 | -52 | 8.63        | <.001           |
| R   | Cerebellum Lobule 7                             |               |                       |                         |                        | 18                | -76 | -42 | 5.19        | .005            |
| L   | <b>Inferior Frontal Gyrus Pars Triangularis</b> | 47            | 258                   | .004                    | .011                   | -46               | 30  | 0   | 4.59        | .036            |
| L   | Inferior Frontal Gyrus Pars Orbitalis           | 47            |                       |                         |                        | -40               | 34  | -12 | 4.2         | .09             |

447

448



449  
450  
451  
452  
453  
454  
455  
456  
457

**Table 5: Sentence Reading vs Baseline.** Loci of peaks (local maxima within a cluster separated by a minimum of 8mm) showing significant (cluster-size  $p < .05$  FDR-corrected for multiple comparisons with a cluster-forming threshold of  $p < .001$  uncorrected) increase in BOLD for visual sentence presentation vs baseline over participants when listening to sentences. Bold rows indicate peak of a cluster. NB that these sentences did not constitute linguistically meaningful stimuli to the illiterate participants. Abbreviations: Hem-Hemisphere, L-Left; R-Right; unc. – uncorrected; fdr – false discovery rate

| Hem      | Label                         | Brodmann Area | Cluster Size (voxels) | Cluster size $p$ (unc.) | Cluster Size $p$ (fdr) | Coordinates (MNI) |            |          | Statistic T  | $p$ (fdr)       |
|----------|-------------------------------|---------------|-----------------------|-------------------------|------------------------|-------------------|------------|----------|--------------|-----------------|
|          |                               |               |                       |                         |                        | x                 | y          | z        |              |                 |
| <b>R</b> | <b>Middle Occipital Gyrus</b> | <b>18</b>     | <b>12509</b>          | <b>&lt;.001</b>         | <b>&lt;.001</b>        | <b>28</b>         | <b>-86</b> | <b>0</b> | <b>10.49</b> | <b>&lt;.001</b> |
| L        | Middle Occipital Gyrus        | 18            |                       |                         |                        | -24               | -90        | 6        | 10.16        | <.001           |
| L        | Middle Occipital Gyrus        | 18            |                       |                         |                        | -28               | -86        | -2       | 9.9          | <.001           |
| L        | Posterior Fusiform Gyrus      | 18            |                       |                         |                        | -20               | -86        | -6       | 9.9          | <.001           |
| L        | Inferior Occipital Gyrus      | 19            |                       |                         |                        | -42               | -76        | -6       | 9.86         | <.001           |
| R        | Superior                      | 18            |                       |                         |                        | 22                | -90        | 10       | 9.52         | <.001           |
| R        | Inferior Occipital Gyrus      | 19            |                       |                         |                        | 40                | -80        | 0        | 9.52         | <.001           |
| R        | Fusiform Gyrus                | 37            |                       |                         |                        | 38                | -52        | -12      | 8.41         | <.001           |
| L        | Posterior Fusiform Gyrus      | 19            |                       |                         |                        | -32               | -74        | -12      | 8.22         | <.001           |
| R        | Inferior Occipital Gyrus      | 37            |                       |                         |                        | 36                | -66        | -8       | 8.14         | <.001           |
| L        | Fusiform Gyrus                | 37            |                       |                         |                        | -42               | -56        | -10      | 7.86         | <.001           |
| L        | Fusiform Gyrus                | 37            |                       |                         |                        | -36               | -42        | -18      | 6.64         | <.001           |
| L        | Inferior Occipital Gyrus      | 19            |                       |                         |                        | -28               | -84        | 20       | 6.47         | <.001           |
| R        | Fusiform Gyrus                | 37            |                       |                         |                        | 34                | -40        | -22      | 6.36         | <.001           |
| R        | Hippocampus                   | 20            |                       |                         |                        | 30                | -28        | -4       | 5.11         | 0.007           |
| R        | Hippocampus                   | 20            |                       |                         |                        | 34                | -12        | -20      | 4.57         | 0.036           |
| R        | Middle Occipital Gyrus        | 19            |                       |                         |                        | 32                | -62        | 30       | 4.12         | 0.116           |
| R        | Hippocampus                   | 20            |                       |                         |                        | 36                | -22        | -14      | 3.75         | 0.322           |

|   |                                 |          |            |              |              |            |            |           |             |              |
|---|---------------------------------|----------|------------|--------------|--------------|------------|------------|-----------|-------------|--------------|
| L | Fusiform Gyrus                  | 30       |            |              |              | -24        | -32        | -16       | 3.69        | 0.364        |
| L | <b>Inferior Parietal Cortex</b> | <b>7</b> | <b>334</b> | <b>0.001</b> | <b>0.006</b> | <b>-24</b> | <b>-48</b> | <b>48</b> | <b>5.87</b> | <b>0.001</b> |
| R | <b>Inferior Parietal Cortex</b> | <b>7</b> | <b>220</b> | <b>0.006</b> | <b>0.021</b> | <b>28</b>  | <b>-48</b> | <b>54</b> | <b>5.72</b> | <b>0.001</b> |

458

459

460

461 In order to determine whether literacy in Devanagari (functionally approximated by  
462 word reading score) has an impact on the BOLD response to speech, as previously  
463 reported for literacy in the Latin alphabet (Dehaene et al., 2010), we conducted a  
464 regression analysis to test for a correlation between word reading score and brain  
465 response during auditory sentence presentation and during visual sentence  
466 presentation.

467

#### 468 **No Evidence that Cerebral Responses to Speech are affected by Literacy**

469 Testing for the effect of literacy on the patterns of BOLD activation revealed no loci  
470 at which there were significant relationships between word reading scores and brain  
471 response during sentence listening, at the relatively liberal threshold of uncorrected  
472 voxelwise  $p < .001$ .

473

474 Despite the absence of significant effects of literacy on the BOLD response to  
475 auditory sentences at whole-brain levels, it is conceivable that a more subtle  
476 relationship was missed. Given the existence of an *a priori* rationale for testing a  
477 specific ROI, we further probed the possibility that PT response to spoken sentences  
478 is modulated by literacy. We carried out a region of interest analysis in which the  
479 subjectwise mean PT response was extracted and tested for a relationship with  
480 literacy.

481

482 Bayesian correlation (Kendall's  $\tau_b$ ) analysis was carried out to test the relationship  
483 between BOLD response to auditory sentence presentation in the two acoustic-  
484 phonetic ROIs (PT and pSTG), and literacy, quantified by Akshara recognition and  
485 word reading scores. These analyses revealed that there is no evidence in favour of  
486 relationships between literacy and brain response (PT, relationship with Akshara  
487 recognition:  $\tau = .095$ ,  $BF_{10} = 0.332$ , relationship with Word reading,  $\tau = .007$ ,  $BF_{10} =$   
488  $0.137$ ; pSTG relationship with Akshara recognition:  $\tau = -.090$ ,  $BF_{10} = 0.303$ ,  
489 relationship with Word reading:  $\tau = -.030$ ,  $BF_{10} = 0.149$ ). The associated Bayes  
490 factors indicate anecdotal to substantial levels of evidence in favour of the null  
491 hypothesis of no relationship between BOLD response and literacy. The ROIs and  
492 the relationships between BOLD response and word reading scores at the first and  
493 second time points are shown in Figure 4.

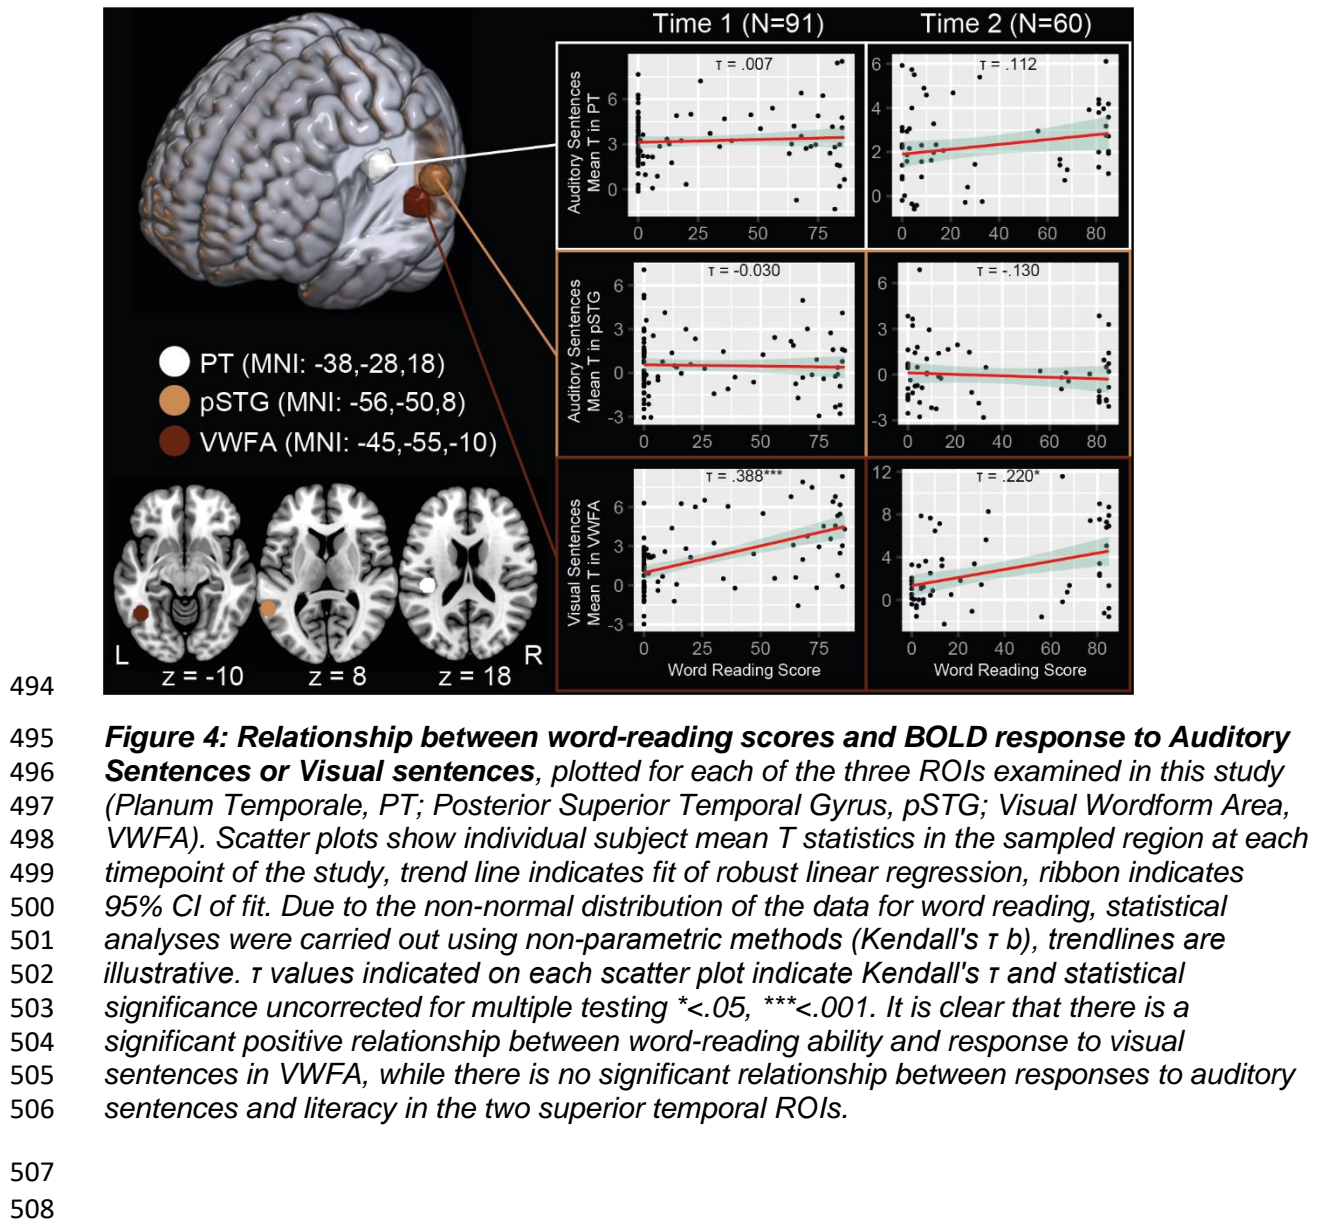

509

## 510 Cerebral Responses to Orthographic Stimuli are Modulated by Literacy

511 As previously reported on these data (Hervais-Adelman et al., 2019), BOLD  
 512 responses to visual sentence presentation was significantly modulated by literacy in  
 513 a number of areas consistent with the reading network, implicating visual, occipito-  
 514 fusiform, midline motor and left inferior frontal gyral regions (Figure 5).

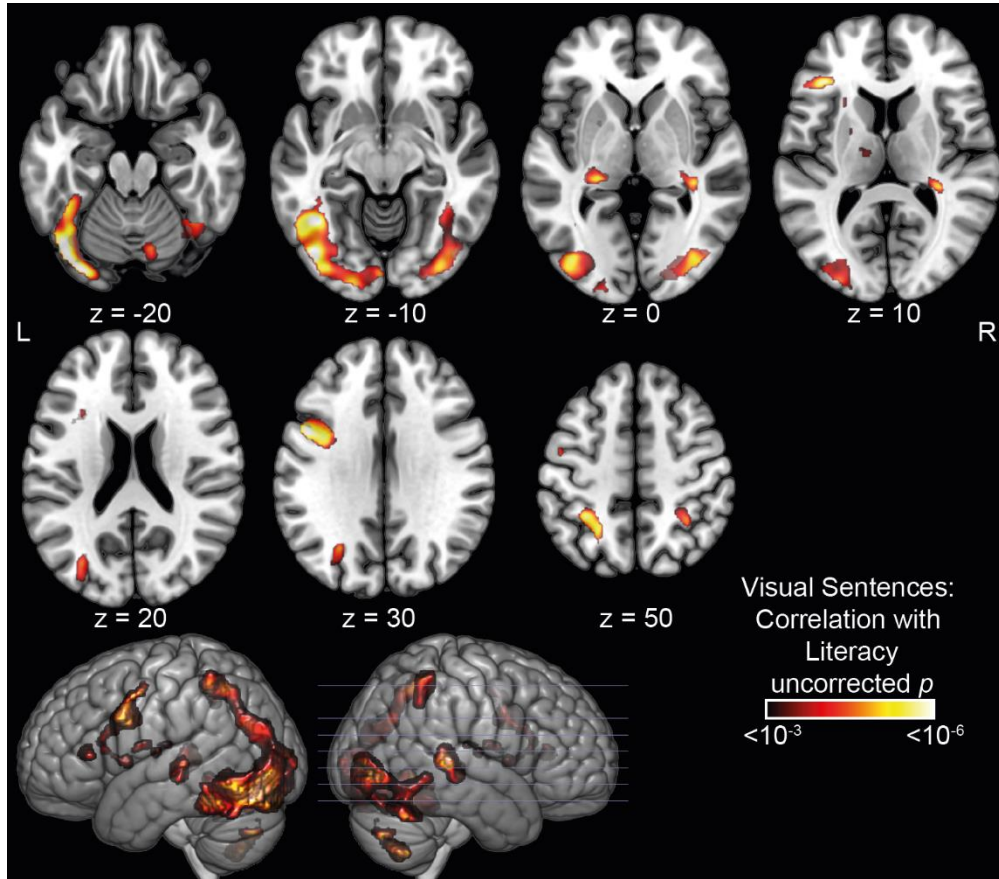

515

516 **Figure 5: Correlation between BOLD response to Visual Sentences and literacy**  
 517 (indexed by word reading score) at Time 1, thresholded using at cluster-mass  $p_{(FDR)} < .05$  with  
 518 a cluster-forming threshold of  $p < .001$ . Results projected onto MNI single subject brain. Z co-  
 519 ordinates (MNI mm) are supplied for each slice and marked on the render in bottom-row.  
 520 Abbreviations: L – left, R - right

521 **Table 6: Modulation of Responses to Written Sentences by Literacy:** Loci of positive  
 522 associations between brain response to visually-presented sentences and literacy, assessed  
 523 by word-reading scores. Cluster-Mass  $p < .05$  FDR-corrected for multiple comparisons with a  
 524 cluster-forming threshold of  $p < .001$  uncorrected. Results are tabulated by cluster and the  
 525 proportion of coverage of neuroanatomical regions are provided for two atlases (see  
 526 methods for details). Coverages do not always sum to 100%, as atlases do not label all  
 527 areas in the brain volume (e.g. white matter, some subcortical areas, CSF, ventricles)

528

| Cluster Size<br>(voxels) | Cluster Mass<br>$p(\text{fdr})$ | Cluster Centre of Mass (MNI) |   |   | Statistic<br>Mean T | Neuroanatomical Labels of Cluster |                      |
|--------------------------|---------------------------------|------------------------------|---|---|---------------------|-----------------------------------|----------------------|
|                          |                                 | x                            | y | z |                     | AAL Atlas                         | Harvard Oxford Atlas |

|             |                  |            |            |           |              |                                                                                                                                                                                                                                                                                                                                                                                                                                                                                                                                                                                 |
|-------------|------------------|------------|------------|-----------|--------------|---------------------------------------------------------------------------------------------------------------------------------------------------------------------------------------------------------------------------------------------------------------------------------------------------------------------------------------------------------------------------------------------------------------------------------------------------------------------------------------------------------------------------------------------------------------------------------|
| <b>7278</b> | <b>&lt;0.001</b> | <b>-8</b>  | <b>-72</b> | <b>-8</b> | <b>3.920</b> | <p>13.04%<br/>Left_Lateral_Occipital_Cortex_inferior_division<br/>12.05%<br/>Left_Occipital_Fusiform_Gyrus<br/>8.37%<br/>Left_Lateral_Occipital_Cortex_superior_division<br/>7.67%<br/>Right_Lateral_Occipital_Cortex_inferior_division<br/>7.41%<br/>Left_Temporal_Occipital_Fusiform_Cortex<br/>6.10%<br/>Right_Occipital_Fusiform_Gyrus<br/>5.29%<br/>Left_Superior_Parietal_Lobule<br/>5.04%<br/>Right_Temporal_Occipital_Fusiform_Cortex</p> <p>13.56% Occipital_Mid_L<br/>10.47% Fusiform_L<br/>8.29% Occipital_Inf_L<br/>6.83% Cerebelum_6_R<br/>5.92% Cerebelum_8_R</p> |
| <b>1545</b> | <b>&lt;0.001</b> | <b>-38</b> | <b>8</b>   | <b>26</b> | <b>3.782</b> | <p>40.13%<br/>Left_Precentral_Gyrus<br/>23.17%<br/>Left_Middle_Frontal_Gyrus<br/>12.69%<br/>Left_Inferior_Frontal_Gyrus_pars_triangularis<br/>9.06%<br/>Left_Inferior_Frontal_Gyrus_pars_opercularis</p> <p>40.52% Precentral_L<br/>18.38% Frontal_Inf_Tri_L<br/>12.36% Frontal_Inf_Oper_L</p>                                                                                                                                                                                                                                                                                  |
| <b>408</b>  | <b>0.022</b>     | <b>32</b>  | <b>-32</b> | <b>2</b>  | <b>3.872</b> | <p>18.38%<br/>Right_Hippocampus<br/>12.99%<br/>Right_Lateral_Ventricle<br/>12.25% Right_Thalamus</p> <p>9.56% Hippocampus_R<br/>5.64% Temporal_Sup_R</p>                                                                                                                                                                                                                                                                                                                                                                                                                        |
| <b>391</b>  | <b>0.022</b>     | <b>-2</b>  | <b>10</b>  | <b>52</b> | <b>3.970</b> | <p>31.71%<br/>Left_Juxtapositional_Lobule_Cortex<br/>28.39%<br/>Left_Paracingulate_Gyrus<br/>18.16%<br/>Left_Superior_Frontal_Gyrus<br/>10.49%<br/>Right_Paracingulate_Gyrus<br/>6.65%</p> <p>81.33%<br/>Supp_Motor_Area_L<br/>17.90%<br/>Supp_Motor_Area_R</p>                                                                                                                                                                                                                                                                                                                 |

|     |       |     |     |    |       |                                           |                                                                     |
|-----|-------|-----|-----|----|-------|-------------------------------------------|---------------------------------------------------------------------|
|     |       |     |     |    |       |                                           | Right_Juxtapositional_Lobule_Cortex                                 |
| 292 | 0.039 | -20 | -30 | -2 | 3.707 | 18.49% Hippocampus_L<br>17.12% Thalamus_L | 56.16% Left_Thalamus<br>16.44% Left_Hippocampus<br>6.16% Brain-Stem |
| 67  | 0.001 | -16 | -10 | 10 | 3.382 | 40.30% Thalamus_L<br>16.42% Putamen_L     | 50.75% Left_Thalamus<br>31.34% Left_Putamen                         |

529  
530

531 To ensure that the expected effect of literacy on brain response could be discerned  
532 for the BOLD response to orthographic stimuli, an analysis of the modulation of  
533 response in VWFA by literacy was carried out. A Bayesian correlation shows  
534 decisive evidence in favour of the existence of a correlation between literacy and  
535 BOLD response while reading sentences (Akshara recognition: Kendall's  $\tau = .354$ ,  
536  $BF_{10} = 27550.521$ ; Word Reading: Kendall's  $\tau = .388$ ,  $BF_{10} = 320744.068$ ).

537 After training, participants showed significant improvements in Akshara recognition  
538 and marginally significant improvements in word reading performance (see  
539 Supplementary materials). The change in brain response to orthographic input as a  
540 function of literacy training in these participants has been described previously  
541 (Hervais-Adelman et al., 2019). Here we focus on three ROIs (PT, pSTG and VWFA)  
542 to establish whether within-participant improvements in reading ability affect the  
543 magnitude of the BOLD response to spoken and orthographic input.

544

#### 545 **Impact of Acquiring Literacy on Responses to Auditory and Visual Sentences** 546 **in PT, pSTG and VWFA**

547 An initial repeated measures ANOVA, with a within-participant factor of Session  
548 (Time 1, Time 2) and a between-participants factor of Group (Literate Control, Non-  
549 Trained Control, Trainee) was carried out to test for a significant group by time point  
550 interaction, which would be indicative of an effect of training. For completeness, this  
551 analysis was carried out on responses to both auditory and visual sentence  
552 presentation in all three ROIs.

553 In PT, no significant group-by-time point interaction was found for either listening to  
554 sentences ( $F_{(2,57)}=0.590$ ,  $p=.558$ , partial  $\eta^2 = .020$ ) or visually-presented sentences  
555 ( $F_{(2,57)}=0.273$ ,  $p=.762$ , partial  $\eta^2 = .009$ ), suggesting that there was no effect of  
556 training on BOLD response to auditory or orthographic sentences in this ROI.  
557 Similarly, there was no significant interaction between time and group for the pSTG  
558 ROI (auditory sentences:  $F_{(2,57)}=0.596$ ,  $p=.555$ , partial  $\eta^2 = .020$ ; visual sentences:  
559  $F_{(2,57)}=0.647$ ,  $p=.527$ , partial  $\eta^2 = .022$ ). In VWFA, however, while there was no  
560 significant group-by-time point interaction for auditory sentences ( $F_{(2,57)}=1.043$ ,  
561  $p=.359$ , partial  $\eta^2 = .035$ ), a significant group-by-time point interaction was found for  
562 visually presented sentences ( $F_{(2,57)}=3.354$ ,  $p=.042$ , partial  $\eta^2 = .105$ ), suggesting

563 that literacy training selectively increased response to orthographic stimuli in the  
564 VWFA (This effect is illustrated in Figure 6).

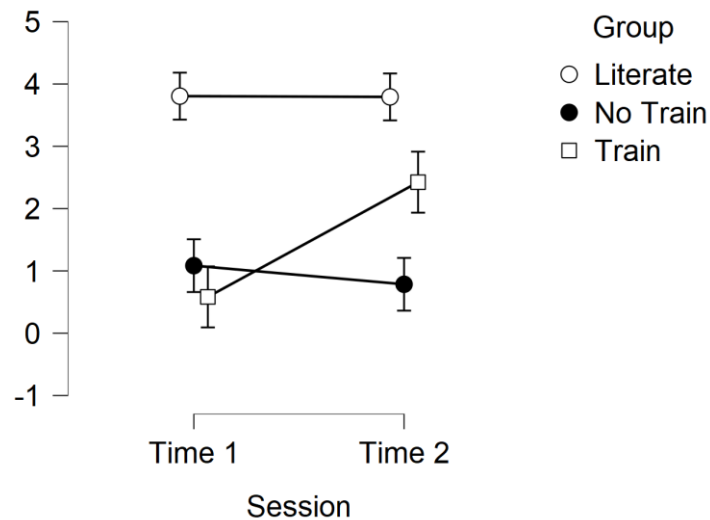

565 **Figure 6: Mean response to Visual Sentences in VWFA ROI, by group and Session.**  
566 *Error bars show standard error of the mean. A literacy-training specific increase in*  
567 *responsiveness can be seen for the Trainee participants who received six months of literacy*  
568 *instruction between sessions.*  
569

570  
571 A follow-up analysis (Bayesian paired t-test) was carried out on the null findings to  
572 determine the relative certainty that there was no categorical difference in brain  
573 response to the auditory or visual sentence materials as a result of training. This  
574 analysis was carried out for the PT and pSTG ROIs, comparing pre-training with  
575 post-training BOLD increase. These analyses revealed varying degrees of  
576 evidence in favour of the null hypothesis that there is **no** increase in response after  
577 training in either PT (auditory:  $BF_{0=}$  0.056; visual:  $BF_{0=}$  0.243), pSTG (auditory:  $BF_{0=}$   
578  $BF_{0=}$  0.076; visual:  $BF_{0=}$  0.978). The same analyses in VWFA showed strong evidence  
579 in favour of the alternative hypothesis that BOLD response to visual sentences was  
580 greater after training ( $BF_{0=}$  7.161), while there was substantial evidence in favour of  
581 the null hypothesis of no difference for the response to auditory sentences ( $BF_{0=}$   
582 0.311).  
583

584 In sum, the analysis of within-subject change after training provides no evidence for  
585 an increase in recruitment of acoustic-phonetic related brain areas, while increasing  
586 literacy does lead to an increase in VWFA responsiveness to visually presented  
587 sentences.

### 588 589 **Functional Connectivity of PT, pSTG and VWFA**

590 It is self-evident that in hearing individuals the acquisition of literacy at some stage  
591 corresponds to acquiring a mapping of spoken language to orthographic symbols.  
592 This presumably implicates auditory processes and may therefore have functional



593 consequences for regions associated with acoustic-phonetic processing. We  
594 therefore sought evidence for an impact of literacy on the functional connectivity of  
595 these regions, during auditory sentence presentation.

596

597 Functional connectivity of PT during spoken sentence presentation is not modulated  
598 by literacy

599 Functional coupling to a seed region (the PT or pSTG ROI), during auditory sentence  
600 presentation was estimated and tested for modulation by literacy. We found no  
601 indication that there was a significant impact of literacy (even at a liberal voxelwise  
602 threshold of uncorrected  $p < .001$ ) on the functional connectivity of the PT ROI.

603

604 Functional Connectivity between pSTG and graphemic/motor frontal area during  
605 auditory sentence presentation increases as a function of literacy

606 A substantial cluster of voxels in dorsal frontal cortex (spanning Brodmann areas 6d,  
607 4a and 4p) showed functional coupling to pSTG during sentence listening that was  
608 significantly positively associated with literacy (Figure 7). This cluster of dorsal  
609 sensorimotor voxels intersects with an area commonly said to have been identified  
610 by Exner (Exner, 1881; Roux, Draper, Köpke, & Démonet, 2010) as crucial for  
611 handwriting and more recently, repeatedly associated with handwriting in a number  
612 of functional imaging (Longcamp, Anton, Roth, & Velay, 2003; Longcamp et al.,  
613 2008; Longcamp et al., 2014; Planton, Longcamp, Péran, Démonet, & Jucla, 2017)  
614 and cortical stimulation studies (Roux et al., 2009). This result suggests that while  
615 learning to read may not necessarily alter the responsiveness of planum temporale  
616 to auditory sentences, a functional relationship between the pSTG acoustic-phonetic  
617 processing area and handwriting representations develops. The important  
618 implication is that learning to associate Devanagari characters with their acoustic-  
619 phonetic form appears to lead to the development of an auditory to graphomotor  
620 mapping.

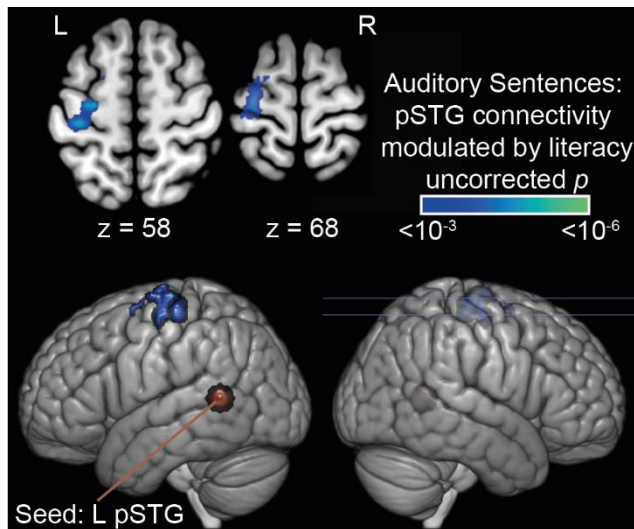

621

622 **Figure 7: Significant correlation between functional connectivity of pSTG and**  
 623 **literacy during auditory sentence processing.** Results thresholded at cluster-  
 624 mass  $p(\text{FDR}) < .05$ , using a cluster-forming threshold of voxelwise  $p < .001$  (single-  
 625 tailed distribution, considering positive relationships only). Results projected onto  
 626 MNI single subject brain. Z co-ordinates (MNI mm) are supplied for each slice and  
 627 marked on the render in bottom-row. Abbreviations: L – left, R - right

628 **Table 7: Significant modulation of pSTG connectivity by literacy during auditory**  
 629 **sentence presentation.** Cluster-Mass  $p < .05$  FDR-corrected for multiple comparisons with a  
 630 cluster-forming threshold of  $p < .001$  uncorrected. Results are tabulated by cluster and the  
 631 proportion of coverage of neuroanatomical regions are provided for two atlases (see  
 632 methods for details). Coverages do not always sum to 100%, as atlases do not label all  
 633 areas in the brain

| Cluster Size<br>(voxels) | Cluster Mass<br>$p(\text{fdr})$ | Cluster Centre of Mass (MNI) |     |    | Statistic<br>Mean T | Neuroanatomical Labels of Cluster                                             |                                                                                                       |
|--------------------------|---------------------------------|------------------------------|-----|----|---------------------|-------------------------------------------------------------------------------|-------------------------------------------------------------------------------------------------------|
|                          |                                 | x                            | y   | z  |                     | AAL Atlas                                                                     | Harvard Oxford Atlas                                                                                  |
| 602                      | .046                            | -24                          | -14 | 58 | 3.564               | 80.33%<br>Precentral_L<br>10.83%<br>Frontal_Sup_2_L<br>5.33%<br>Postcentral_L | 74.67% Left_Precentral_Gyrus<br>16.50% Left_Postcentral_Gyrus<br>8.83%<br>Left_Superior_Frontal_Gyrus |

634

635 Functional connectivity of VWFA to auditory and prefrontal cortices during visual  
 636 sentence presentation is modulated by literacy

637 As an additional control, the connectivity of VWFA was examined during sentence  
 638 reading and the correlation between connectivity and literacy was evaluated. This  
 639 revealed a broad pattern of connectivity between VWFA and the wider reading  
 640 network (Figure 8), including the left inferior frontal gyrus, left dorsal premotor  
 641 cortices and supplementary motor areas, alongside bilateral visual areas and a  
 642 region of posterior superior temporal sulcus associated with processing of speech.  
 643 This latter cluster is somewhat distant, both neuroanatomically and in terms of

644 auditory-processing (Rutten, Santoro, Hervais-Adelman, Formisano, & Golestani,  
 645 2019) from the planum temporale ROI examined in this study, but abuts the pSTG  
 646 ROI defined *a priori*.

647

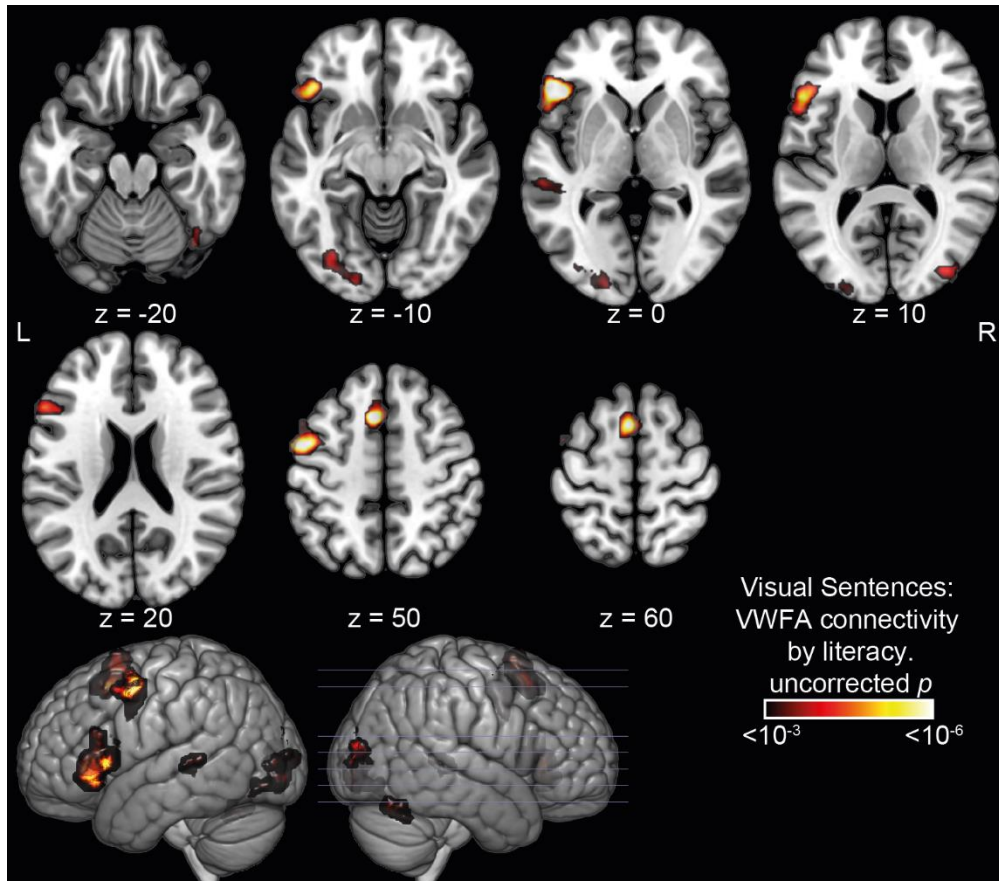

648

649 **Figure 8: Brain areas showing significant modulation of VWFA connectivity by**  
 650 **literacy during visual sentence processing.** Results thresholded at cluster-mass  
 651  $p(\text{FDR}) < .05$ , using a cluster-forming threshold of voxelwise  $p < .001$  (single-tailed  
 652 distribution, considering positive relationships only). Results projected onto MNI  
 653 single subject brain. Z co-ordinates (MNI mm) are supplied for each slice and  
 654 marked on the render in bottom-row. Abbreviations: L – left, R - right

655 **Table 8 Significant modulation of VWFA connectivity by literacy during visual**  
 656 **sentence presentation.** Loci of positive associations between literacy and effective  
 657 connectivity of VWFA during visual sentence presentation. Cluster-level  $p < .05$  FWE-  
 658 corrected for multiple comparisons with a cluster-forming threshold of  $p < .001$  uncorrected.  
 659 Bold rows indicate peak of a cluster. Abbreviations: Brodmann Area; Hem-Hemisphere, L-  
 660 Left; R-Right; FWE –Familywise Error

| Cluster Size<br>(voxels) | Cluster Mass<br>$p(\text{fdr})$ | Cluster Centre of Mass (MNI) |   |   | Statistic<br>Mean T | Neuroanatomical Labels of Cluster |                      |
|--------------------------|---------------------------------|------------------------------|---|---|---------------------|-----------------------------------|----------------------|
|                          |                                 | x                            | y | z |                     | AAL Atlas                         | Harvard Oxford Atlas |

|      |       |     |     |     |       |                                                                                             |                                                                                                                                                                                                       |
|------|-------|-----|-----|-----|-------|---------------------------------------------------------------------------------------------|-------------------------------------------------------------------------------------------------------------------------------------------------------------------------------------------------------|
| 1074 | <.001 | -48 | 26  | 0   | 4.244 | 61.33%<br>Frontal_Inf_Tri_L<br>26.03%<br>Frontal_Inf_Orb_2_L<br>9.93%<br>Frontal_Inf_Oper_L | 40.36%<br>Left_Inferior_Frontal_Gyrus_pars_triangularis<br>27.90%<br>Left_Inferior_Frontal_Gyrus_pars_opercularis<br>20.60%<br>Left_Frontal_Orbital_Cortex<br>10.21%<br>Left_Frontal_Operculum_Cortex |
| 540  | <.001 | -46 | 0   | 46  | 4.138 | 89.07% Precentral_L<br>6.48% Frontal_Mid_2_L                                                | 65.37%<br>Left_Precentral_Gyrus<br>34.63%<br>Left_Middle_Frontal_Gyrus                                                                                                                                |
| 507  | 0.010 | -18 | -90 | -4  | 3.403 | 55.34% Occipital_Mid_L<br>21.54% Occipital_Inf_L<br>8.50% Fusiform_L<br>6.72% Lingual_L     | 41.50% Left_Occipital_Pole<br>34.58%<br>Left_Occipital_Fusiform_Gyrus<br>19.57%<br>Left_Lateral_Occipital_Cortex_inferior_division                                                                    |
| 493  | <.001 | -6  | 12  | 54  | 4.087 | 91.08%<br>Supp_Motor_Area_L<br>5.27%<br>Supp_Motor_Area_R                                   | 55.58%<br>Left_Superior_Frontal_Gyrus<br>19.27%<br>Left_Juxtapositional_Lobule_Cortex<br>19.07%<br>Left_Paracingulate_Gyrus                                                                           |
| 267  | 0.016 | 38  | -62 | -26 | 3.931 | 49.81% Cerebelum_6_R<br>40.82%<br>Cerebelum_Crus1_R<br>9.36% Fusiform_R                     | 24.34%<br>Right_Occipital_Fusiform_Gyrus<br>16.10%<br>Right_Temporal_Occipital_Fusiform_Cortex                                                                                                        |
| 189  | 0.041 | 38  | -84 | 12  | 3.498 | 95.08% Occipital_Mid_R                                                                      | 38.80%<br>Right_Lateral_Occipital_Cortex_inferior_division<br>38.80%<br>Right_Lateral_Occipital_Cortex_superior_division;                                                                             |
| 189  | 0.037 | -56 | -34 | 4   | 3.723 | 87.23%<br>Temporal_Mid_L<br>9.04% no_label                                                  | 82.45%<br>Left_Superior_Temporal_Gyrus_posterior_division<br>9.04%<br>Left_Middle_Temporal_Gyrus_posterior_division<br>5.85%<br>Left_Planum_Temporale                                                 |

661  
662

663

## 664 **Literacy training increases functional connectivity of pSTG and GMFA during** 665 **auditory sentence presentation**

666 If learning to read is responsible for the observed correlation between literacy and  
667 functional connectivity of pSTG with GMFA during auditory sentence presentation,  
668 then the literacy training intervention should drive an increase in this connectivity.  
669 Connectivity estimates for all participants who returned for a second scan were  
670 estimated for the pSTG. Individual connectivity parameters at the centre of mass of  
671 the cluster identified as GMFA above (using a sphere of radius 8mm centred at MNI:  
672 -14, -24, 58) were extracted and tested for an effect of training using a repeated  
673 measures ANOVA (within-participants factor: Time 1, Time 2; between-participants  
674 factor: Literate Control, Untrained Control, Trainee). This analysis revealed a  
675 significant group-by-time comparison ( $F_{(2,57)}=4.602$ ,  $p=.015$ , partial  $\eta^2 = .139$ ), with  
676 post-hoc pairwise comparison showing that the effect is driven by an increase in  
677 connectivity in the trainees ( $t=3.324$ ,  $p_{\text{holm}}=.023$ ), which was not found in the other  
678 groups (Literate:  $t=-0.331$ ; Untrained:  $t=-.607$ , both  $p_{\text{holm}}>.999$ ).

679

## 680 **Discussion**

681 Surprisingly, given the dominant assumption that literacy necessarily induces  
682 changes to online speech processing, we find no evidence for changes to online  
683 speech processing, either cross-sectionally or longitudinally, with Bayesian analyses  
684 suggesting substantial evidence in favour of there being no effect. However, there is  
685 compelling evidence that a functional connection during speech processing arises  
686 between pSTG and graphomotor areas, as a result of literacy.

687

688 These findings contrast starkly with those previously presented for literate and ex-  
689 illiterate readers of alphabetic script (Dehaene et al., 2010), who showed modulation  
690 of PT response during sentence listening as a function of literacy status. It was  
691 hypothesised that this is due to enhanced phonological processing, which is  
692 engaged in an obligatory manner during continuous speech processing. We find no  
693 such evidence, calling into question the *generalisability* of the hypothesis of radical  
694 reconfiguration of the functional role of auditory processing areas by the acquisition  
695 of literacy. Not only is there no whole brain level nor ROI-level effect of literacy on  
696 brain response to auditory sentence presentation, there is substantial evidence (at  
697 the ROI level) in favour of the hypothesis that there is no impact of literacy.

698 Nevertheless, we do not seek to call into question the substantial body of evidence  
699 that points towards behavioural consequences of literacy for speech processing  
700 tasks. However, the limited evidence that orthographic knowledge *can* affect the  
701 processing of spoken words comes from metalinguistic tasks that are completely or  
702 mostly offline such as rhyme judgments (Seidenberg & Tanenhaus, 1979), phoneme  
703 monitoring (Dijkstra, Roelofs, & Fieuws, 1995; Halle, Chereau, & Segui, 2000) and  
704 word blending (Ventura, Kolinsky, Brito-Mendes, & Morais, 2001), which require  
705 participants explicitly to breakdown (individual) spoken words into smaller units.  
706 Some other behavioural studies finding evidence for orthography-on-speech effects

707 have used tasks that do not require meta-phonological judgments but which are  
708 clearly meta-linguistic in nature, such as auditory lexical decision and shadowing  
709 (Chereau, Gaskell, & Dumay, 2007; Ventura, Morais, Pattamadilok, & Kolinsky,  
710 2004) and are far removed from how people ordinarily listen to spoken language.  
711 The few behavioural studies that have used online speech tasks suggest that  
712 orthographic knowledge may *not* modulate online speech (Mitterer & Reinisch,  
713 2015).

714 The limited number of neuroscientific studies investigating this issue are subject to  
715 similar confounds. Perre and colleagues (Perre, Pattamadilok, Montant, & Ziegler),  
716 for instance, observed that orthographic consistency effects were localised to  
717 phonological processing areas such as left BA40 (the supramarginal gyrus) when  
718 participants made lexical decisions. Pattamadilok et al. (Pattamadilok, Knierim,  
719 Kawabata Duncan, & Devlin, 2010) also used a lexical decision task and observed  
720 that orthographic consistency effects disappeared when phonological processing  
721 was interfered with by using repetitive TMS applied to phonological processing areas  
722 (the supramarginal gyrus). The same was not observed when TMS was applied to  
723 orthographic processing regions. As for the behavioural studies discussed above,  
724 there are substantial doubts regarding the extent to which responses in meta-  
725 linguistic tasks (such as lexical decision) are a good proxy for normal speech  
726 processing (Diependaele, Brysbaert, & Neri, 2012; Gibbs & Van Orden, 1998;  
727 Keuleers & Brysbaert, 2011).

728 One likely explanation for this apparent discord is that the participants in the present  
729 investigation were varyingly literate in Devanagari script, which, in contrast to Latin  
730 script is not alphabetic – it is an abugida (Daniels, 2020). This raises the intriguing  
731 possibility that neural orthography-on-speech processing effects are in fact script-  
732 specific rather than universal. It is conceivable that the Devanagari abugida imposes  
733 different visual to orthographic mapping requirements in comparison to an alphabetic  
734 one as the characters encode consonant-vowel pairs (syllables) rather than sub-  
735 syllabic segments (phonemes). Devanagari and Latin scripts' properties intersect at  
736 the conceptual level of sound-symbol mapping and the necessity of assembling  
737 sequential symbols to compose words. The evidence presented above suggests that  
738 having learned the mappings between orthographic symbols and their phonological  
739 renderings *per se* does not necessarily induce changes to the processing of  
740 continuous speech in the auditory system as a whole, nor in areas specifically  
741 investigated due to the *a priori* evidence of their role in acoustic-phonetic processing  
742 of speech.

743 There is substantial debate about the nature of representation of the acoustic units of  
744 human speech sounds. Traditionally it has been assumed that the phoneme is the  
745 basic unit of speech, a position that seems "logical" when letters map onto  
746 phonemes. However, although it is reasonable to assume some form of phoneme-  
747 letter mapping for highly-researched alphabetic writing systems such as English, it is  
748 not an account that is likely to be true across the writing systems of the world.  
749 Logosyllabic scripts (e.g. Chinese, see Daniels, 2020) have a many-to-one mapping  
750 between symbols and sounds, and are fundamentally intransparent (the sound of a  
751 word cannot straightforwardly be derived from its symbol), in syllabic scripts (e.g.

752 Kana of Japanese) every symbol encodes a syllable (although there is no  
753 transparent relationship between the symbol and the consonant and vowel  
754 component), and in abugidas (e.g. Indic and Ethiopic scripts, see Daniels, 2020)  
755 every symbol systematically encodes a consonant with a modifier encoding a vowel  
756 (or a consonant with an inherent vowel, when unmarked). These different scripts  
757 reflect different spoken language units when compared to the phoneme-letter  
758 mappings of alphabets (logosyllabaries: morphemes and words, syllabary: syllables,  
759 abugidas: mappings at multiple levels of granularity). Indeed, previous research  
760 strongly suggests that phoneme units are not ‘needed’ until people learn to read an  
761 alphabetic script. A large number of studies has shown that awareness of subsyllabic  
762 speech units such as phonemes does not arise spontaneously but that it has to be  
763 taught during learning to read (Morais, 2021; Morais, Cary, Alegria, & Bertelson,  
764 1979). Moreover, even in languages with an alphabetic writing system, a phoneme is  
765 typically not produced in isolation – speech planning and production take place at  
766 either the syllable or segment level (Laganaro, 2019), which map more directly onto  
767 syllable-sized orthographic symbols. It is conceivable that learning to map  
768 subsyllabic segments to a visual code in alphabetic writing systems might require or  
769 induce modifications to auditory processing and representations of speech in order  
770 to support the phoneme-level manipulations and representations that are relevant for  
771 writing in that specific orthographic system.

772

773 We propose that the nature of the speech unit encoded in the orthographic system  
774 used by literate individuals must be considered when generating hypotheses about  
775 the impact of literacy on speech sound representation and processing. Ultimately, we  
776 would argue that literacy in all orthographies is not equivalent, and that drawing  
777 conclusions of a universal nature from investigations of alphabetic literacy alone is  
778 problematic. As we have previously discussed (Hervais-Adelman et al., 2019), the  
779 impact of literacy on visual processing reported by Dehaene and colleagues for  
780 alphabetic literates (2010) was not replicated in this group of Hindi-speaking  
781 individuals, underscoring the need for further investigations to provide concordant, or  
782 discordant, evidence for influential proposals.

783

784 An especially intriguing finding of the present study is that the pSTG ROI showed  
785 greater functional connectivity with GFMA during spoken sentence processing both  
786 cross-sectionally as a function of literacy and longitudinally within-participant as a  
787 result of literacy training. The functional connectivity between this region of posterior  
788 superior temporal cortex that is associated with acoustic-phonetic processing of  
789 phonemes and the handwriting-related areas of the dorsal motor and premotor  
790 cortices is of outstanding interest. Literacy is almost never acquired as a purely  
791 receptive skill but also involves an important production component when learning to  
792 write by hand (but also in typing). It has previously been demonstrated that  
793 recognizing (alphabetic) letters activates premotor cortical areas consistent with the  
794 representation of the hand habitually used to write (Longcamp et al., 2008). This is  
795 compelling evidence for a functional role of graphomotor processes in reading.  
796 However, the role of learning to write in developing acoustic-phonetic  
797 representations at the level encoded by the script is barely discussed, even though  
798 there would be every reason to posit that creating motor-auditory mappings for  
799 writing must be as important in becoming literate as learning the visual-auditory  
800 bases for decoding script.

801

802 While future studies will be necessary to better examine the implications of this  
803 functional relationship, the data at hand indicate that, in literate individuals, there is  
804 significantly greater coupling between hand-motor regions and auditory processing  
805 areas during online sentence processing, in the absence of any orthographic or  
806 manual task. Although it is consistent with classical Hebbian processes (Hebb, 1949)  
807 that repeated pairings of orthographic tokens with their spoken representations  
808 during learning can lead to functional coupling as a result of exercising orthographic  
809 output, the relevance of this to spoken language processing is unclear. Importantly, it  
810 suggests that we must consider the role of auditory-manual mapping in theories of  
811 the role of literacy in the development of phonological representation and  
812 processing.

813 Future, ideally pre-registered longitudinal, studies will be required to systematically  
814 examine the potential script specificity (alphabetic vs non-alphabetic) of literacy-  
815 induced modulations of responses to speech, in the presence and absence of  
816 metalinguistic tasks, and to better understand the role of graphomotor learning in  
817 influencing auditory processing of speech.

818

## 819 **Acknowledgments**

### 820 **Funding:**

821 This project was funded by a Max Planck Society Strategic Innovation Grant to FH

822 AH-A is supported by the Swiss National Science Foundation (grant number  
823 PP00P1\_163726)

### 824 **Author contributions:**

825 Conceptualization: FH, RKM

826 Methodology: AH-A, FH, RKM

827 Investigation: UK, RKM, VNT, AG, JPS, FH

828 Visualization: AH-A

829 Supervision: FH

830 Writing: AH-A, FH

831

832 **Competing interests:** The authors declare that they have no competing interests.

833 **Data and materials availability:** Raw data can be made available upon reasonable  
834 request to FH. Custom analysis code can be made available upon request to AH-A

835

836



837

## 838 **References**

- 839 Ashburner, J., & Friston, K. J. (2005). Unified segmentation. *Neuroimage*, *26*(3), 839-851.  
840 doi:10.1016/j.neuroimage.2005.02.018
- 841 Buchanan, E. M. (2018). MeMoBootR. Retrieved from <https://github.com/doomlab/MeMoBootR>
- 842 Chereau, C., Gaskell, M. G., & Dumay, N. (2007). Reading spoken words: Orthographic effects in  
843 auditory priming. *Cognition*, *102*(3), 341-360. doi:10.1016/j.cognition.2006.01.001
- 844 Chevillet, M. A., Jiang, X., Rauschecker, J. P., & Riesenhuber, M. (2013). Automatic Phoneme  
845 Category Selectivity in the Dorsal Auditory Stream. *Journal of Neuroscience*, *33*(12), 5208-+.  
846 doi:10.1523/Jneurosci.1870-12.2013
- 847 Daniels, P. T. (2020). Foundations of graphonomy. *Journal of Cultural Cognitive Science*, 1-11.
- 848 Dehaene, S., Pegado, F., Braga, L. W., Ventura, P., Nunes Filho, G., Jobert, A., . . . Cohen, L. (2010).  
849 How learning to read changes the cortical networks for vision and language. *Science*,  
850 *330*(6009), 1359-1364. doi:10.1126/science.1194140
- 851 Diependaele, K., Brysbaert, M., & Neri, P. (2012). How Noisy is Lexical Decision? *Front Psychol*, *3*,  
852 348. doi:10.3389/fpsyg.2012.00348
- 853 Dijkstra, T., Roelofs, A., & Fieuws, S. (1995). Orthographic Effects on Phoneme Monitoring. *Canadian*  
854 *Journal of Experimental Psychology-Revue Canadienne De Psychologie Experimentale*, *49*(2),  
855 264-271. doi:Doi 10.1037/1196-1961.49.2.264
- 856 Exner, S. (1881). *Untersuchungen über die Localisation der Functionen in der Grosshirnrinde des*  
857 *Menschen*: Wilhelm Braumüller.
- 858 Friederici, A. D. (2012). The cortical language circuit: from auditory perception to sentence  
859 comprehension. *Trends Cogn Sci*, *16*(5), 262-268. doi:10.1016/j.tics.2012.04.001
- 860 Gibbs, P., & Van Orden, G. C. (1998). Pathway selection's utility for control of word recognition.  
861 *Journal of Experimental Psychology-Human Perception and Performance*, *24*(4), 1162-1187.  
862 doi:Doi 10.1037/0096-1523.24.4.1162
- 863 Hagoort, P. (2017). The core and beyond in the language-ready brain. *Neurosci Biobehav Rev*, *81*(Pt  
864 B), 194-204. doi:10.1016/j.neubiorev.2017.01.048
- 865 Halle, P. A., Chereau, C., & Segui, J. (2000). Where is the vertical bar b vertical bar in "absurde"  
866 [apsyrd]? It is in French listeners' minds. *Journal of Memory and Language*, *43*(4), 618-639.  
867 doi:DOI 10.1006/jmla.2000.2718
- 868 Hebb, D. O. (1949). *The organization of behavior*. New York: Wiley.
- 869 Henrich, J., Heine, S. J., & Norenzayan, A. (2010). The weirdest people in the world? *Behav Brain Sci*,  
870 *33*(2-3), 61-83; discussion 83-135. doi:10.1017/s0140525x0999152x
- 871 Hervais-Adelman, A., Kumar, U., Mishra, R. K., Tripathi, V. N., Guleria, A., Singh, J. P., . . . Huettig, F.  
872 (2019). Learning to read recycles visual cortical networks without destruction. *Science*  
873 *Advances*, *5*(9), eaax0262. doi:10.1126/sciadv.aax0262
- 874 Hickok, G. (2012). The cortical organization of speech processing: Feedback control and predictive  
875 coding the context of a dual-stream model. *Journal of Communication Disorders*, *45*(6), 393-  
876 402. doi:10.1016/j.jcomdis.2012.06.004
- 877 JASP Team. (2020). JASP (Version 0.14.1).
- 878 Keuleers, E., & Brysbaert, M. (2011). Detecting inherent bias in lexical decision experiments with the  
879 LD1NN algorithm. *The Mental Lexicon*, *6*(1), 34-52.
- 880 Laganaro, M. (2019). Phonetic encoding in utterance production: a review of open issues from 1989  
881 to 2018. *Language Cognition and Neuroscience*. doi:10.1080/23273798.2019.1599128
- 882 Longcamp, M., Anton, J. L., Roth, M., & Velay, J. L. (2003). Visual presentation of single letters  
883 activates a premotor area involved in writing. *Neuroimage*, *19*(4), 1492-1500.
- 884 Longcamp, M., Boucard, C., Gilhodes, J. C., Anton, J. L., Roth, M., Nazarian, B., & Velay, J. L. (2008).  
885 Learning through hand- or typewriting influences visual recognition of new graphic shapes:

- 886 Behavioral and functional imaging evidence. *Journal of Cognitive Neuroscience*, 20(5), 802-  
887 815. doi:DOI 10.1162/jocn.2008.20504
- 888 Longcamp, M., Lagarrigue, A., Nazarian, B., Roth, M., Anton, J. L., Alario, F. X., & Velay, J. L. (2014).  
889 Functional specificity in the motor system: Evidence from coupled fMRI and kinematic  
890 recordings during letter and digit writing. *Hum Brain Mapp*, 35(12), 6077-6087.  
891 doi:10.1002/hbm.22606
- 892 Mitterer, H., & Reinisch, E. (2015). Letters don't matter: No effect of orthography on the perception  
893 of conversational speech. *Journal of Memory and Language*, 85, 116-134.  
894 doi:10.1016/j.jml.2015.08.005
- 895 Morais, J. (2021). The phoneme: A conceptual heritage from alphabetic literacy. *Cognition*, 104740.  
896 doi:<https://doi.org/10.1016/j.cognition.2021.104740>
- 897 Morais, J., Cary, L., Alegria, J., & Bertelson, P. (1979). Does awareness of speech as a sequence of  
898 phones arise spontaneously? *Cognition*, 7(4), 323-331. doi:[https://doi.org/10.1016/0010-](https://doi.org/10.1016/0010-0277(79)90020-9)  
899 [0277\(79\)90020-9](https://doi.org/10.1016/0010-0277(79)90020-9)
- 900 Pattamadilok, C., Knierim, I. N., Kawabata Duncan, K. J., & Devlin, J. T. (2010). How Does Learning to  
901 Read Affect Speech Perception? *The Journal of neuroscience*, 30(25), 8435-8444.  
902 doi:10.1523/jneurosci.5791-09.2010
- 903 Perre, L., Pattamadilok, C., Montant, M., & Ziegler, J. C. (2009). Orthographic effects in spoken  
904 language: On-line activation or phonological restructuring? *Brain Research*, 1275, 73-80.  
905 doi:10.1016/j.brainres.2009.04.018
- 906 Planton, S., Longcamp, M., Péran, P., Démonet, J.-F., & Jucla, M. (2017). How specialized are writing-  
907 specific brain regions? An fMRI study of writing, drawing and oral spelling. *Cortex*, 88, 66-80.  
908 doi:<https://doi.org/10.1016/j.cortex.2016.11.018>
- 909 Price, C. J. (2012). A review and synthesis of the first 20 years of PET and fMRI studies of heard  
910 speech, spoken language and reading. *Neuroimage*, 62(2), 816-847.  
911 doi:10.1016/j.neuroimage.2012.04.062
- 912 R Core Team. (2015). R: A Language and Environment for Statistical Computing. Vienna, Austria: R  
913 Foundation for Statistical Computing. Retrieved from <https://www.R-project.org/>
- 914 Roux, F.-E., Draper, L., Köpke, B., & Démonet, J.-F. (2010). Who actually read Exner? Returning to the  
915 source of the frontal "writing centre" hypothesis. *Cortex*, 46(9), 1204-1210.
- 916 Roux, F. E., Dufour, O., Giussani, C., Wamain, Y., Draper, L., Longcamp, M., & Démonet, J. F. (2009).  
917 The graphemic/motor frontal area Exner's area revisited. *Annals of Neurology*, 66(4), 537-  
918 545.
- 919 Rutten, S., Santoro, R., Hervais-Adelman, A., Formisano, E., & Golestani, N. (2019). Cortical encoding  
920 of speech enhances task-relevant acoustic information. *Nature Human Behaviour*, 3(9), 974-  
921 987. doi:10.1038/s41562-019-0648-9
- 922 Seidenberg, M. S., & Tanenhaus, M. K. (1979). Orthographic Effects on Rhyme Monitoring. *Journal of*  
923 *Experimental Psychology-Human Learning and Memory*, 5(6), 546-554. doi:Doi  
924 10.1037/0278-7393.5.6.546
- 925 Ventura, P., Kolinsky, R., Brito-Mendes, C., & Morais, J. (2001). Mental representations of the syllable  
926 internal structure are influenced by orthography. *Language and Cognitive Processes*, 16(4),  
927 393-418. doi:Doi 10.1080/01690960042000184
- 928 Ventura, P., Morais, J., Pattamadilok, C., & Kolinsky, R. (2004). The locus of the orthographic  
929 consistency effect in auditory word recognition. *Language and Cognitive Processes*, 19(1),  
930 57-95. doi:10.1080/01690960344000134
- 931 Whitfield-Gabrieli, S., & Nieto-Castanon, A. (2012). Conn: a functional connectivity toolbox for  
932 correlated and anticorrelated brain networks. *Brain Connect*, 2(3), 125-141.  
933 doi:10.1089/brain.2012.0073
- 934 Winkler, A. M., Ridgway, G. R., Webster, M. A., Smith, S. M., & Nichols, T. E. (2014). Permutation  
935 inference for the general linear model. *Neuroimage*, 92, 381-397.  
936 doi:10.1016/j.neuroimage.2014.01.060
